# Supplementary material
Source: PubMed Central journal article supplement (PMC4535342)
Supplement: NIHMS703760-supplement-SI.pdf [file NIHMS703760-supplement-SI.pdf]

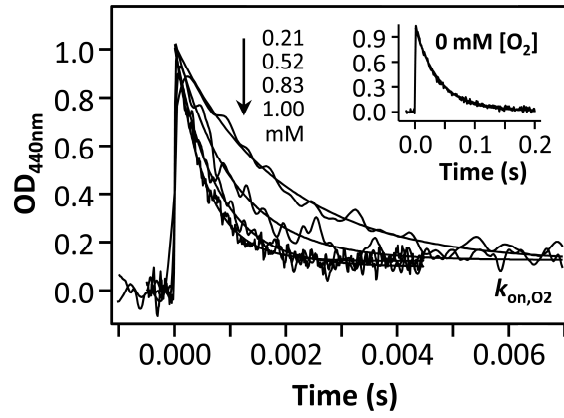

**Fig. S1.** The O<sub>2</sub> association kinetic traces of the G8<sub>WF</sub> mutant of Ctb in the presence of various concentration of O<sub>2</sub>.

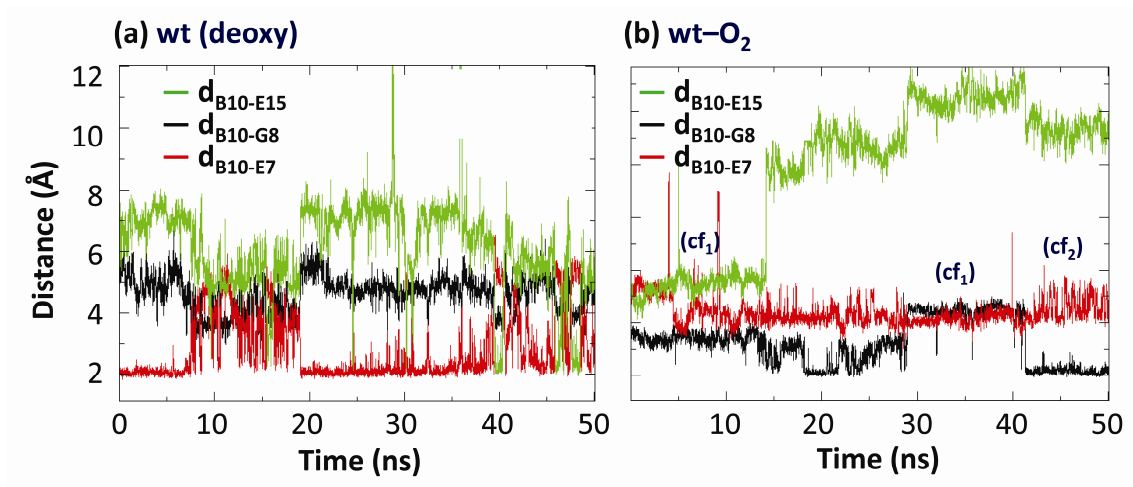

**Fig. S2.** Time evolution of the various intramolecular distances during the 50 ns MD simulations of the deoxy (a) and O<sub>2</sub>-bound derivatives of Ctb. The distances associated with potential H bonds,  $d_{B10-G8}$  and  $d_{B10-E15}$ , are defined as the distances between the hydroxylic oxygen of TyrB10 and the indole NH proton of TrpG8 and TrpE15, respectively, while the distance between TyrB10 and HisE7,  $d_{B10-E7}$ , is defined as the distance between the hydroxylic hydrogen of TyrB10 and the N $\epsilon$  of HisE7.

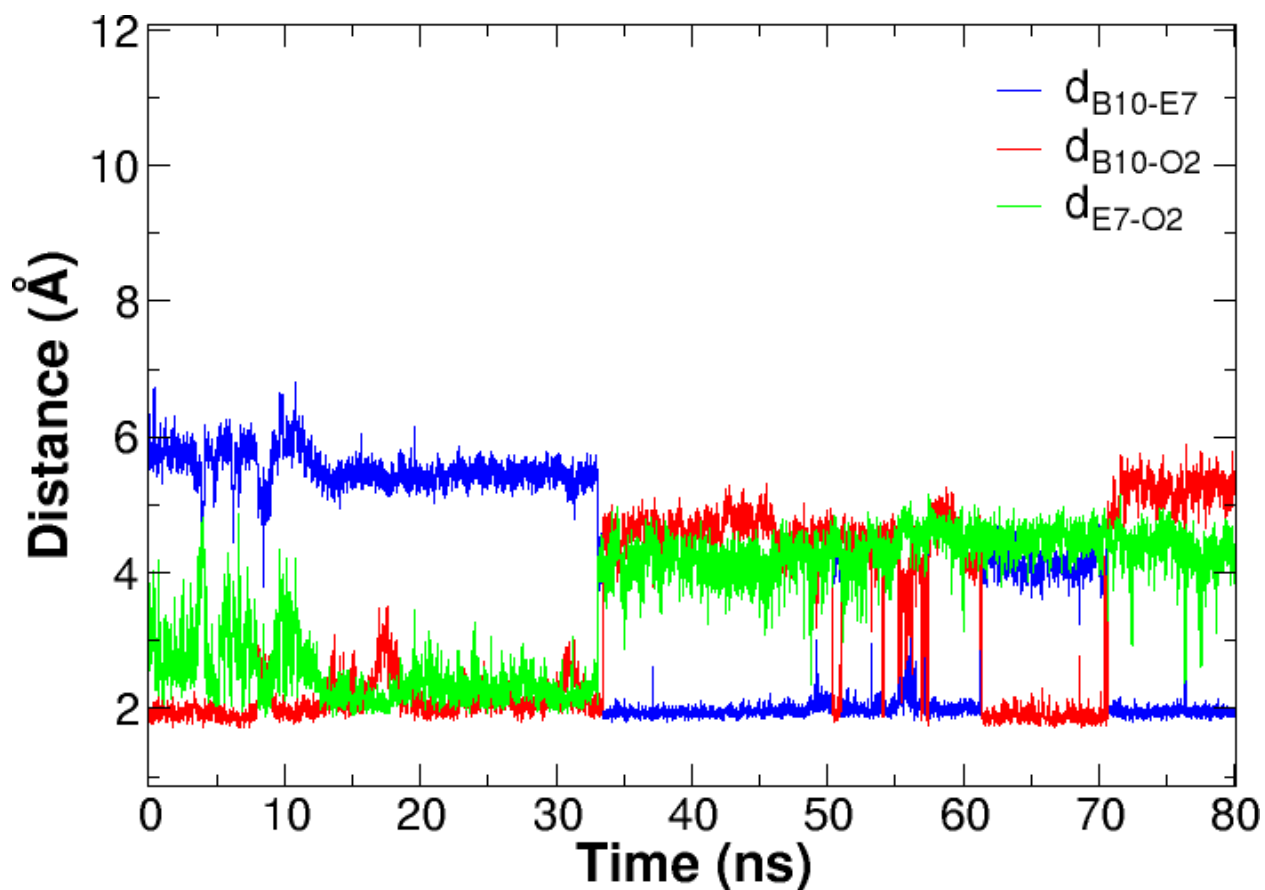

**Fig. S3.** Time evolution time evolution of  $d_{B10-E7}$ ,  $d_{B10-O2}$  and  $d_{E7-O2}$  during the 50 ns MD simulations of the  $O_2$ -adduct of the  $G8_{WF}$  mutant of Ctb. The distances associated with potential HBS,  $d_{B10-E7}$ ,  $d_{E7-O2}$ , and  $d_{B10-O2}$ , are defined as the distances between the hydroxylic hydrogen of the TyrB10 and the imidazolic  $N\delta$  proton of the HisE7, and between the terminal oxygen of the  $O_2$  ligand and the hydroxylic hydrogen of the TyrB10 and the imidazolic  $N\epsilon$  proton of the HisE7, respectively
